1 **Experimental copper exposure, but not heat stress, leads to elevated intraovarian thyroid**  
2 **hormone levels**

3 Ruuskanen Suvi\*, Mottola Giovanna, Anttila Katja

4 Department of Biology, University of Turku, Finland

5 \*Corresponding author: Suvi Ruuskanen, Department of Biology, University of Turku,  
6 Vesilinnantie 5, 20500 Turku, Finland. Email: [suvi.ruuskanen@utu.fi](mailto:suvi.ruuskanen@utu.fi)

7

8 **Abstract**

9 Climate change and pollution are some of the greatest anthropogenic threats to wild animals.  
10 Transgenerational plasticity – when parental exposure to environmental stress leads to changes  
11 in offspring phenotype – has been recently highlighted as a potential mechanism to respond to  
12 various environmental and anthropogenic changes across taxa. Transgenerational effects may  
13 be mediated via multiple mechanisms, such as transfer of maternal hormones to eggs/fetus.  
14 However, sources of variation in hormone transfer are poorly understood in fish, and thus the  
15 first step is to characterize whether environmental challenges alter transfer of maternal  
16 hormones to eggs. To this end, we explored the genetic and environmental variation (in  
17 response to temperature and endocrine disrupting copper) in maternal thyroid hormone (TH),  
18 transfer to offspring in a common fish model species, the three-spined stickleback  
19 (*Gasterosteus aculeatus*) using multiple approaches: (i) We compared ovarian TH levels  
20 among six populations across a wide geographical range in the Baltic Sea, including two  
21 populations at high water temperature areas (discharge water areas of nuclear power plants)  
22 and we experimentally exposed fish to (ii) environmentally relevant heat stress and (iii) copper  
23 for 7 days. We found that populations did not differ in intraovarian TH levels, and short-term  
24 heat stress did not influence intraovarian TH levels. However, copper exposure increased both  
25 T4 and T3 levels in ovaries. The next step would be to evaluate if such alterations would lead  
26 to changes in offspring phenotype.

27 **Capsule: We show that experimental copper exposure, but not heat stress (experimental**  
28 **or among-population variation), leads to elevated ovarian thyroid hormone levels in**  
29 **sticklebacks.**

30

31 Keywords: thyroid hormones, T3, T3, plasticity, maternal effect, endocrine disruption, metal  
32 pollution, heat stress

33

## 34 **Introduction**

35 Climate change and pollution are some of the greatest anthropogenic threats to wild  
36 populations. Organisms may respond to changes in their environment by showing plastic  
37 responses (Habary et al., 2017; Parmesan, 2006; Stillman and Armstrong, 2015). One recently  
38 highlighted form of plasticity is transgenerational plasticity, i.e. when variation in parental  
39 environment leads to changes in offspring phenotype (e.g. Donelson et al., 2012; Donelson et  
40 al., 2018; Metzger and Schulte, 2017; Meylan et al., 2012; Salinas and Munch, 2012; Shama  
41 et al., 2014; Shama and Wegner, 2014). For example, Shama et al. (2014) showed in their  
42 seminal paper rapid transgenerational acclimation to elevated temperature, although the  
43 molecular mechanisms are not yet understood. Transgenerational effects may be mediated via  
44 multiple mechanisms, such as epigenetic markers or transfer of maternal hormones or RNAs  
45 to eggs/fetus (e.g. Adrian-Kalchhauser et al., 2018; Best et al., 2018; Kim et al., 2019; Metzger  
46 and Schulte, 2017; Meylan et al., 2012; Ruuskanen and Hsu, 2018).

47       Hormones transferred from the mother to embryos and eggs are known to profoundly  
48 influence offspring development, physiology, morphology, behavior and even survival across  
49 taxa (mammals, Dantzer et al., 2013; fish, McCormick, 1999; birds, Ruuskanen, 2015;  
50 Ruuskanen and Hsu, 2018; reptiles, Uller et al., 2007). One class of these hormones is thyroid  
51 hormones (THs, prohormone thyroxine T<sub>4</sub>, and biologically active tri-iodothyronine, T<sub>3</sub>) and  
52 recent studies suggest that maternal THs transferred to eggs and embryos are important for  
53 offspring development across vertebrates (fish, Brown et al., 2014; birds, Hsu et al., 2017; Hsu  
54 et al., 2019; mammals, Patel et al., 2011; Ruuskanen et al., 2016a). THs are a key class of  
55 hormones that control and regulate vital biological processes such as thermogenesis,  
56 reproduction but also growth and metamorphosis (Norris and Carr, 2013). THs are critical  
57 regulators of thermal acclimation in fish, increasing in higher temperatures, (e.g. Little et al.,  
58 2013) and plasma THs have been found to fluctuate with varying water temperature (e.g.

59 Arjona et al., 2010; Cyr et al., 1998; Eales, 1985). However, THs are subject to endocrine  
60 disruption by various chemicals, such as PBC, dioxins and heavy metals, such as lead  
61 (Matthiessen et al., 2018; Norris and Carr, 2006). A less studied, but a potential endocrine-  
62 disrupting chemical (EDC) is copper (Cu), although the results are controversial: Copper  
63 exposure has been found both increase and decrease plasma THs in fish, depending on species  
64 and timing of exposure (Eyckmans et al., 2010; Hoseini et al., 2016; Oliveira et al., 2008).

65 Surprisingly, studies characterizing the environmental or genetic sources of among-  
66 female (or within-female) variation in egg TH levels are rare (Ruuskanen and Hsu 2018), yet,  
67 such variation could contribute to variation in offspring phenotype and fitness and help to  
68 understand the scope for transgenerational plasticity. Thus, the first step is to characterize  
69 whether environmental challenges affect transfer of maternal hormones to eggs. In birds, egg  
70 TH levels vary with food availability (Hsu et al., 2016) and temperature (Ruuskanen et al.,  
71 2016c), while T3 (but not T4) also shows heritable variation (Ruuskanen et al., 2016b, Hsu et  
72 al. 2019). In fishes, there is indication for variation in egg THs among stocks (rainbow trout,  
73 *Oncorhynchus mykiss*, Leatherland et al., 1989), which could reflect either genetic or  
74 environmental variation. Interestingly, McComb et al. (2005) reported that the egg T3 and T4  
75 concentration in bonnethead sharks (*Sphyrna tiburo*) from Tampa Bay was consistently higher  
76 than from eggs from Florida Bay. The authors suggested that this may be due to higher  
77 temperatures in Tampa Bay, and speculated that egg THs might, thus, explain the faster growth  
78 rates and metabolic rates at this site. In the rare examples on endocrine disruption, experimental  
79 exposure to pollutants (lead, polybrominated diphenyl ethers and bisphenol A) resulted in  
80 decreases plasma and egg THs in zebrafish (*Danio rerio*) (Chen et al., 2017), with delayed  
81 larvae development (Wei et al., 2018). The effects of other pollutants, such as copper, on egg  
82 hormone transfer have not been addressed, yet the effects of pollutants on plasma levels (see

83 above) suggest that such effects may be likely. However, no systematic investigation into the  
84 sources of variation in egg THs have been conducted in fish (Ruuskanen and Hsu, 2018).

85 We explored the causes of variation in maternal thyroid hormones in a common fish  
86 model, the three-spined stickleback (*Gasterosteus aculeatus*). Given the extremely scarce  
87 literature, we took an exploratory approach and studied environmental and potential genetic  
88 variation in maternal TH transfer using correlational and experimental approaches. This species  
89 was selected as it is an abundant and wide-spread species across the Northern Hemisphere, and  
90 an important species in biomonitoring and ecotoxicology as well as in behavioural and  
91 ecological studies (e.g. Scholz and Mayer, 2008). First, we sampled fish in six populations in  
92 the Baltic Sea (Fig 1), of which two were from discharge water areas of nuclear power plants,  
93 and four reference populations. Areas used for nuclear power discharge waters function as a  
94 natural experiment for long-term temperature increases, mimicking the effects of global  
95 warming, as discharged water is about 10-12 °C warmer than the intake water, and the  
96 discharge has continued for decades (Keskitalo and Ilus, 1987). This higher water temperature  
97 at the nuclear power plants could be a potential selecting agent on thermal physiology,  
98 including TH levels. We measured intraovarian THs of the fish from these six populations after  
99 an acclimation period in the laboratory. If there has been selection for altered TH metabolism  
100 and TH transfer in wild populations in these warmer water areas, we expect to see altered  
101 ovarian TH levels in the populations at the vicinity of the nuclear power plants compared to  
102 reference areas. Given that stickleback populations across the Baltic Sea are genetically  
103 different from each other, and the populations differ in response to thermal habitats and salinity  
104 they encounter (Guo et al., 2015), we may also expect overall differences in THs among the  
105 six populations. Furthermore, we tested the effects of temperature also experimentally by  
106 exposing the fish from each population to a mild temperature treatment (10°C increase),

107 mimicking a heat wave. We predict that intraovarian T3 and T4 should be higher in the heat  
108 stress treatment compared to controls, due to increasing metabolic rates.

109 Second, contamination in the Baltic Sea is quite high with metals such as copper (but  
110 also zinc, lead, cadmium and mercury) reported in sediments, seawater, and e.g. liver tissues  
111 of herring and cod, and they influence e.g. physiology in mussels (Lehtonen et al., 2019; Perttinen  
112 et al., 1982). Given that copper pollution can disrupt thyroid hormone levels in adult fish, we  
113 experimentally tested if maternal metal exposure to an environmentally relevant dose of copper  
114 can influence intraovarian hormone levels, i.e. allocation of hormones to eggs.

115

## 116 **Materials and methods**

### 117 *Study areas, catching and maintenance*

118 The experiments were conducted with wild, adult female three-spined sticklebacks caught from  
119 a wide geographical range, six different locations across the Baltic Sea (see Fig 1). Three of  
120 the locations were in Gulf of Finland and three in Gulf of Bothnia. In both Gulfs one of the  
121 locations was in the cooling water discharge area of a nuclear power plant, where discharged  
122 water is about 10-12 °C warmer than the surface water and the discharge has continued for  
123 decades (Keskitalo and Ilus, 1987). In Gulf of Finland the areas were Loviisa (LOV, Nuclear  
124 Power Plant area, N6021.928; E2622.228), Kotka (KOT, reference site, N6026.103;  
125 E2652.181) and Porvoo (POO, reference site, N6015.090; E2546.134). In Gulf of Bothnia the  
126 areas were Olkiluoto (OLK, Nuclear Power Plant area, N61.2360278; E21.4347222),  
127 Pyhäranta (PYH, reference site, N6057.149; E2125.986) and Pori (POR, reference site,  
128 N6130.140; E2135.675). Temperatures, salinity and pH of the locations during catching in May  
129 2018 are presented in Supplementary Table 1. Temperature loggers (three per area, HOBO  
130 Water Temp Pro v2 Logger, U22, Onset Computer Corporation, Bourne, MA, USA) were

131 situated directly at the catching locations at the sea bottom (depth 1.5-2 m) and water  
132 temperature was recorded 16/5/2018 – 31/8/2018 from all the locations four times per day. The  
133 average daily temperatures  $\pm$  SD are presented in Supplementary Table 1.

134 The adult fish were caught with beach seine net and transferred to University of Turku  
135 for rearing. No mortalities were observed during the transfer and the acclimation period in  
136 laboratory facilities. The fish (N=100 per population, mixed sexes, some of the fish were used  
137 also in other experiments) were let to acclimate into 180 L tanks at +16°C for two weeks (each  
138 population in its own tank). Water salinity was 4 ppt (filtered water with 76% NaCl; 20%  
139 MgSO<sub>4</sub>; 3.5% CaCl<sub>2</sub>; 0.5% KHCO<sub>3</sub>), pH=8 and oxygen saturation over 80%. Photoperiod was  
140 set to 17L:7D. Fish were fed with frozen bloodworms (Delang & Ekman AB/ Akvarieteknik,  
141 Sweden) five times per week. One third of the water was changed once a week. Upon arrival  
142 the fish were treated against nematodes using Nematol (Sera GmbH, Heinberg, Germany)  
143 according to the instructions of the manufacturer. In order to reduce any tank effects the fish  
144 were tagged intraperitoneally with 1.35×7 mm RFID subcutaneous microchips (Loligo®  
145 Systems, Viborg, Denmark) under anesthesia (100 ppm MS-222 in 4 ppt brackish water  
146 buffered with 6 ppm HCO<sub>3</sub>) after two weeks' acclimation period. The populations were mixed  
147 into nine tanks (with density of 2L/fish) and were let to recover for three weeks before further  
148 testing.

149

### 150 *Experimental treatments*

151 After the recovery period, the fish were exposed to three different environmental conditions in  
152 their rearing tanks: control (CTRL7D), sublethal level of copper (Cu 7D) or heat stress (HS  
153 7D) for one week. Equal numbers of fish from each sampling location were distributed to all  
154 three treatments. Fish were sampled before and after the exposures (see below). The sub-lethal  
155 copper exposure (CU 7D) was conducted for a total number of 127 fish in three tanks (20

156 female fish from one tank were sampled for the current study). A total of 120 fish in three  
157 replicate control tanks (CTRL 7D) were treated similarly but no copper was added to tanks (25  
158 female fish from one tank were sampled for the current study). For exposure,  $\text{Cu}^{2+}$  was added  
159 manually as copper (II) sulphate pentahydrate solution (nominal:  $100\mu\text{g/L}$  of  $\text{CuSO}_4 \cdot 5\text{H}_2\text{O}$ ,  
160 Merck, Darmstadt, Germany) to the experimental tanks. This concentration of copper  
161 represents environmentally relevant concentrations encountered in polluted waters (Sanchez et  
162 al., 2005). Water samples were taken both from exposure and control tanks (i) 2 hrs and (ii)  
163 one week after the release of copper in order to measure the copper concentration during one  
164 week of exposure (no water changes were done during the exposure). Fifty millilitres of water  
165 was sampled in polypropylene Falcon tubes from tanks. In order to keep water samples fresh  
166 prior to analyses, 1 ml of concentrated  $\text{HNO}_3/100\text{ml}$  was added to the samples and samples  
167 were kept at  $+4^\circ\text{C}$  before analyses at SYNLAB Analytics & Services Finland Oy (Karkkila,  
168 Finland). The copper levels were measured by using inductively coupled plasma mass  
169 spectrometry (ICP-MS) (ThermoFisher Scientific, MA, USA). 5 fish died during the one week  
170 of exposure.

171 A third group of fish (N=125 in total in three tanks, 20 female fish from one tank were  
172 sampled for the current study) was exposed to heat stress (HS 7D) for a week during the same  
173 time as the other fish were exposed to copper/control treatment. For simulating an  
174 environmental heat wave the water temperature in the experimental tanks ( $16^\circ\text{C}$ ) was gradually  
175 increased by  $1^\circ\text{C}$  every 30 minutes until reaching  $26^\circ\text{C}$  and kept at this temperature for a week.  
176 The warming experimental set-up was done with chiller-heater (Julabo, Model: F32; AC: 230V  
177 50/60 Hz 12A, Julabo GmbH, Seelback, Germany) connected to stainless steel coils. Six fish  
178 died during the exposure to heat stress.

179

180 ***Sampling procedure***

181 Before exposing fish to heat stress or copper, 17 female fish were sampled from a control tank  
182 (hereafter CTRL). Fish were sacrificed with cranial percussion. Tag code, weight (g), length  
183 (cm) were recorded from each fish. For the current study the ovaries were collected and flash  
184 frozen in liquid nitrogen. Samples were stored at -80°C for further molecular analyses. Similar  
185 sampling of the fish and ovaries was conducted also seven days after exposure for control  
186 (CTRL7D), copper exposure (Cu7D) and heat stress treatment (HS7D) for a total number of  
187 65 female fish.

188

189 ***Thyroid hormone analyses***

190 The whole content of thawed ovaries (i.e. egg follicles and associated ovarian fluids) was gently  
191 squeezed out of the ovaries directly into a microcentrifuge tube and the sample was weighed  
192 (~0.001g). Samples were analysed for T3 and T4 at the University of Turku. LCMS/MS was  
193 conducted at the facilities of Turku Center for Biotechnology. T4 and T3 were extracted from  
194 yolk following previously published methods (de Escobar et al. 1985, Ruuskanen et al. 2018).  
195 In short, samples were homogenized in methanol in tissue lyser (Quiagen, Retsch GmbH, Haan,  
196 Germany). As an internal recovery tracer, a known amount of <sup>13</sup>C<sub>12</sub>-T4 (Larodan, Sweden) was  
197 added to each sample. This allowed us to control for the variation in recovery (i.e. extraction  
198 efficiency) for each sample. Next, 400 µl of chloroform was added to sample. After  
199 centrifugation (15 min, 1900 g, +4°C), the supernatant was collected and the pellet was re-  
200 extracted in a mixture of chloroform and methanol (2:1). Back-extraction into an aqueous phase  
201 (0.05% CaCl<sub>2</sub>) was followed by a re-extraction with a mixture of chloroform:methanol: 0.05%  
202 CaCl<sub>2</sub> (3:49:48) and this phase was further purified in-house on Bio-Rad AG 1-X2 (USA) resin  
203 columns. The iodothyronines were eluted with 70% acetic acid, and evaporated under N<sub>2</sub>.



204 Blanks (plain reagents without any sample) were analysed in each extraction batch to detect  
205 any contamination. Samples from different populations and treatments were equally distributed  
206 across four extraction batches. There was no difference among the batches in hormone  
207 concentrations ( $F < 1.0$ ,  $p > 0.38$ ). T3 and T4 were quantified using a nanoflow liquid  
208 chromatography-mass spectrometry (nano-LC-MS/MS) method, developed and validated in  
209 Ruuskanen et al. (2018). Briefly, before the analysis, the dry samples were diluted in  
210 ammonium ( $\text{NH}_3$ ). Internal standards  $^{13}\text{C}_6\text{-T}_3$  and  $^{13}\text{C}_6\text{-T}_4$  (Sigma-Adrich, St.Louis, USA) were  
211 added to each sample to identify and quantify the THs. A triple quadrupole mass spectrometer  
212 (TSQ Vantage, Thermo Scientific, San Jose, CA) was used to analyse the samples. For the  
213 chromatographic separation of hormones, a nanoflow HPLC system Easy-nLC (Thermo  
214 Scientific) was applied. On-column quantification limits were 10.6 amol for T4 and 17.9 amol  
215 for T3. MS data was acquired automatically using Thermo Xcalibur software (Thermo Fisher  
216 Scientific) and analysed using Skyline (MacLean et al. 2010). For the analyses, peak area ratios  
217 of sample to internal standard were calculated. TH concentrations are expressed as pg/mg fresh  
218 mass. Few samples failed in the extraction, see samples sizes in Fig 3.

219

#### 220 *Statistical analysis*

221 All statistical analyses were conducted with SAS Enterprise Guide version 7.1. T4  
222 concentration (pg/mg) was log-transformed to reach normality. We first analysed differences  
223 in intraovarian T3 and T4 among long-term heat exposed (i.e. populations in the vicinity of the  
224 nuclear power plants that are exposed to warm discharge waters; pooled LOV and OLK, N =  
225 13 individuals) and reference populations (pooled POO, POR, KOT, PYH, N = 24 individuals)  
226 using a linear model, using fish mass as a covariate. Data from individuals from control  
227 treatments (CRTL and CRTL7D) were only included in this analysis. We then analysed  
228 differences in intraovarian T3 and T4 concentration among all populations, again using data

229 only from the control treatments. From POO, we only had 1 individual for this analysis, and  
230 thus this population was excluded from the analysis. Population and fish mass were included  
231 as fixed effects.

232 Differences in ovarian T3 and T4 concentration between treatments (CRTL 7D, Cu  
233 7D, HS 7D) were analysed using linear mixed models where treatment and fish body mass  
234 were included as fixed effects and population as a random intercept to account for non-  
235 independence of fish from the same population. Finally, we also repeated the above models for  
236 fish size (mm). Post-hoc tests were further used to test pair-wise differences among treatments.  
237 Models were reduced by removing non-significant factors ( $\alpha = 0.05$ ). Normality and  
238 heteroscedasticity of the residuals were visually inspected. Degrees of freedom were estimated  
239 with Satterthwaite estimation method. Means and standard errors (SE) are shown in the text  
240 and in the figures.

241

## 242 *Results*

243 When using data from control treatments only (pooled CRTL and CRTL 7D), we found no  
244 differences in intraovarian T3 or T4 concentration in sites exposed to warm discharge waters  
245 (pooled LOV and OLK) compared to reference sites (pooled four reference sites, T3:  $F_{1,36} =$   
246  $0.88$ ,  $p = 0.18$ , T4:  $F_{1,36} = 0.25$ ,  $p = 0.62$ ; Mean (pg/mg)  $\pm$ SE: T3 exposed populations:  
247  $1.60 \pm 0.19$ , T3 reference populations:  $2.21 \pm 0.24$ ; T4 exposed populations:  $0.57 \pm 0.08$ ; T4  
248 reference populations  $0.53 \pm 0.04$ ). When further comparing all populations, we found no strong  
249 statistical evidence for differences among populations in intraovarian T3 or T4 concentration  
250 (T3:  $F_{4,30} = 0.50$ ,  $p = 0.73$ , T4:  $F_{4,30} = 2.38$ ,  $p = 0.08$ ; Fig 2a, b). Body mass correlated negatively  
251 with intraovarian T3 concentration (estimate  $\pm$ SE:  $-0.842 \pm 0.363$ ,  $F_{1,30} = 5.37$ ,  $p = 0.027$ ), but  
252 not with T4 concentration ( $F_{1,30} = 0.0$ ,  $p = 0.96$ ). Fish size did not differ among exposed and

253 reference populations ( $F_{1,35} = 1.89$ ,  $p = 0.18$ ), while there were small differences among  
254 populations ( $F_{4,32} = 6.92$ ,  $p = 0.004$ ): fish from KOT were significantly smaller than those from  
255 OLK, PYH and POR (see Suppl Table 2).

256 In the copper exposure treatment, the measured concentrations of copper were 91, 101,  
257 91 and 22  $\mu\text{g/L}$  after 2 hrs and 35, 48, 37 and 18  $\mu\text{g/L}$  after one week in the three exposure and  
258 one control tank, respectively. The exposure concentration was relatively high but within  
259 environmentally relevant concentration range and has not been shown to cause mortality in  
260 sticklebacks in previous studies (Sanchez et al., 2005). According to chemical water analyses  
261 all the fish in current study were exposed to low concentration of the copper since they were  
262 brought to laboratory facilities due to the technical purity of salts for producing brackish water.  
263 After experimental exposure to copper for 7 days, fish from copper exposure group had higher  
264 intraovarian T3 and T4 concentration compared to fish from control treatment (T3: overall test  
265  $F_{2,53.1} = 3.14$ ,  $p = 0.05$ , post-hoc Control vs Cu  $t_{52.3} = -2.30$ ,  $p = 0.02$ ; T4:  $F_{2,53} = 2.62$ ,  $p = 0.08$ ,  
266 Control vs Cu  $t_{53.8} = -2.26$ ,  $p = 0.027$ , Fig 3a, b). T3 or T4 concentrations of fish from the heat  
267 treatment did not differ statistically from control treatment (post-hoc p-values  $>0.45$ ), while  
268 ovarian T3 concentration was lower in heat treatment compared to copper exposed fish ( $t_{52} =$   
269 2.52,  $p = 0.045$ , Fig 2a). Fish size did not differ among the treatments ( $F_{2,51} = 0.64$ ,  $p = 0.53$ ).

270

271

## 272 **Discussion**

273 In contrast to our predictions, we found no evidence that intraovarian TH levels of individuals  
274 originating from populations close to a long-term heat source (nuclear power plant discharge  
275 waters), differ from individuals originating from reference populations. Furthermore, the six  
276 populations sampled across a wide geographical range over the Baltic Sea showed similar  
277 intraovarian TH levels after acclimation in captivity. These results suggest that populations do  
278 not show strong genetic (or permanent developmentally induced) variation in intraovarian T4  
279 or T3 levels, although at least some Baltic Sea stickleback populations are known to be  
280 genetically differentiated (Guo et al., 2015). However, we cannot rule out that environmental  
281 sources of variation (temperature, salinity, food availability) could influence intraovarian THs  
282 in the wild. Among-population variation in egg THs in field populations was indeed reported  
283 by McComb et al. (2005) in bonnethead sharks. Nevertheless, given that intraovarian THs  
284 were not influenced by short-term experimental exposure to heat, we may conclude that  
285 temperature – using the tested experimental duration and scope – may not influence transfer of  
286 THs to eggs and offspring. The sample size was, however, rather low in the among-population  
287 comparison, and the differences in environmental conditions (see Suppl Table 1) among the  
288 populations were rather small at the time of the sampling, thus the results should be interpreted  
289 with caution. Interestingly, stickleback adaptive divergence from marine to stream  
290 environment has been found to involve thyroid hormone signalling (Kitano and Lema, 2013;  
291 Kitano et al., 2010), thus it would be interesting to further compare the egg THs from  
292 freshwater and marine populations to understand the role of transgenerational plasticity in the  
293 adaptation process.

294 We found that individuals exposed to environmentally relevant concentrations of  
295 copper for seven days showed higher intraovarian T3 and T4 levels than controls. While

296 associations between copper and maternal THs have not been studied to date in fish, previous  
297 studies on the associations between copper as an EDC and THs in plasma show complex  
298 patterns depending on the duration of the exposure and species, as reported in Eyckmanns et  
299 al. (2010): In common carp (*Cyprinus carpio*), T3 levels were *elevated* only after long-term  
300 exposure (1 month), while in gibel carp (*Carassius gibelio*) there was a *decrease* in T3 from  
301 24 h to 1 month of exposure. Both species showed *increases* in T4 over short-and long-term  
302 exposure. In rainbow trout, T4 levels were *elevated* very fast after copper exposure and  
303 remained elevated for 12h, whereas there was *no influence* on T3. Copper exposure also  
304 *increased* plasma T4 in the common carp in another experiment (Hoseini et al., 2016). Finally,  
305 copper exposure significantly *decreased* T3 but not T4 in European eels (*Anguilla Anguilla*)  
306 (Oliveira et al., 2008), suggesting changes in deiodination from T4 to T3 in tissues. These  
307 inconsistencies may be explained by experimental conditions and dosages, exposure time and  
308 species-specific responses.

309         The association between plasma and intraovarian/egg hormone levels in fish has not  
310 been fully elucidated, but if we assume that there is some correlation between intraovarian and  
311 circulating TH levels (Ayson and Lam, 1993; Brown et al., 1988; Brown et al., 2014; Kang and  
312 Chang, 2004; Raine and Leatherland, 2003), our results are in parallel with those of common  
313 carp (see above). Interestingly, our hormone measurements of the two forms (T3 higher than  
314 T4) were contrasting compared to whole body measurements in the same species (T3 lower  
315 than T4, Gardell et al., 2017), and egg measurements on other species (T3 lower than T4, Chen  
316 et al., 2017). We can speculate that this may be due to differential deposition of the two forms,  
317 or deiodinase function, converting T4 to T3 in the ovaries in these species and sample type.  
318 The increased T4 and T3 levels in response to copper exposure reported in this study suggest  
319 that T4 biosynthesis or degradation was altered, but also that conversion of T4 to T3 was  
320 potentially increased. Increased TH levels could be explained by increased metabolic rates and

321 energy expenditure in response to copper exposure, along with increased oxidative stress (De  
322 Boeck et al., 2006; De Boeck et al., 1997; Sanchez et al., 2005). All in all, this evidence  
323 suggests that copper exposure changes plasma and associated ovarian TH levels. The next step  
324 would be to evaluate whether such changes lead to changes in on offspring development, such  
325 as metabolism and thermotolerance.

326 In contrast to our predications, we did not find any differences in TH concentrations  
327 between experimental heat treatment and control. In a previous study it has been found that  
328 three weeks acclimation to high and low temperature changed the muscle TH profile of  
329 zebrafish, warm acclimated fish having higher concentrations of T3 and T2 than cold  
330 acclimated ones (Little et al., 2013). However, in their study the warm-acclimated fish were  
331 not sensitive to changes in hormone levels suggesting that with temperature exposure also e.g.  
332 TH transporters and receptors need to be evaluated. This could be one reason why we did not  
333 see any change in egg TH levels with heat stress even though it is well known that heat stress  
334 increases the metabolic rate of fish (e.g. Anttila et al., 2013; Fry, 1947).

335 We conclude that variation in intraovarian THs was not explained by (genetic) variation  
336 among populations nor short-term heat exposure. Given that parental temperature environment  
337 is known to alter offspring phenotype (e.g. Donelson et al., 2012; Donelson et al., 2018), further  
338 studies are needed to elucidate the molecular mechanism of such transgenerational effects.  
339 Both T4 and T3 levels in ovaries were altered in response to moderate copper exposure, and  
340 now the next step is to characterize potential functional consequences of altered THs on  
341 offspring phenotype, which would allow us to understand the scope for transgenerational  
342 endocrine disruption.

343

344 **Acknowledgements**

345 **Compliance with Ethical Standards:**

346 All procedures were conducted under licenses from the Animal Experiment Board of the  
347 Administrative Agency of South Finland (ESAVI/2867/2018). All applicable international,  
348 national, and/or institutional guidelines for the care and use of animals were followed. A pre-  
349 print version of this manuscript has been submitted to BioRxiv (Ruuskanen et al. 2019) and  
350 will be replaced with the final version upon acceptance.

351 **Funding**

352 The project was financially supported by Academy of Finland (SR), Kone Foundation (KA)  
353 and Turku Collegium for Science and Medicine (KA).

354 **Conflict of Interest**

355 We declare no conflict of interest.

356

357 **Acknowledgements**

358 We thank Jenni Saukkonen and Tytti Uurasmaa for field and experimental support.

359

## 360 **References**

- 361 Adrian-Kalchauer, I., et al., 2018. RNA sequencing of early round goby embryos reveals that  
362 maternal experiences can shape the maternal RNA contribution in a wild vertebrate. *Bmc*  
363 *Evolutionary Biology*. 18, 14.
- 364 Anttila, K., et al., 2013. Optimum Temperature in Juvenile Salmonids: Connecting Subcellular  
365 Indicators to Tissue Function and Whole-Organism Thermal Optimum. *Physiological and*  
366 *Biochemical Zoology*. 86, 245-256.
- 367 Arjona, F. J., et al., 2010. Acclimation of *Solea senegalensis* to different ambient temperatures:  
368 implications for thyroidal status and osmoregulation. *Marine Biology*. 157, 1325-1335.
- 369 Ayson, F. G., Lam, T. J., 1993. Thyroxine injection of female rabbitfish (*Siganus guttatus*) broodstock –  
370 changes thyroid hormone levels in plasma, eggs and yolk-sac larvae, and its effects on larval  
371 growth and survival. *Aquaculture*. 109, 83-93.
- 372 Best, C., et al., 2018. Epigenetics in teleost fish: From molecular mechanisms to physiological  
373 phenotypes. *Comparative Biochemistry and Physiology B-Biochemistry & Molecular Biology*.  
374 224, 210-244.
- 375 Brown, C. L., et al., 1988. Maternal triiodothyronine injection cause increases in swimbladder  
376 inflation and survival rates in larval striped bass, *Morone saxatilis*. *Journal of Experimental*  
377 *Zoology*. 248, 168-176.
- 378 Brown, C. L., et al., 2014. Maternal Thyroid and Glucocorticoid Hormone Interactions in Larval Fish  
379 Development, and Their Applications in Aquaculture. *Reviews in Fisheries Science &*  
380 *Aquaculture*. 22, 207-220.
- 381 Chen, L. G., et al., 2017. Transgenerational endocrine disruption and neurotoxicity in zebrafish larvae  
382 after parental exposure to binary mixtures of decabromodiphenyl ether (BDE-209) and lead.  
383 *Environmental Pollution*. 230, 96-106.
- 384 Cyr, D. G., et al., 1998. Effects of long-term temperature acclimation on thyroid hormone deiodinase  
385 function, plasma thyroid hormone levels, growth, and reproductive status of male Atlantic  
386 cod, *Gadus morhua*. *General and Comparative Endocrinology*. 109, 24-36.
- 387 Dantzer, B., et al., 2013. Density Triggers Maternal Hormones That Increase Adaptive Offspring  
388 Growth in a Wild Mammal. *Science*. 340, 1215-1217.
- 389 De Boeck, G., et al., 2006. Swimming performance and energy metabolism of rainbow trout,  
390 common carp and gibel carp respond differently to sublethal copper exposure. *Aquatic*  
391 *Toxicology*. 80, 92-100.
- 392 De Boeck, G., et al., 1997. Effects of sublethal copper exposure on copper accumulation, food  
393 consumption, growth, energy stores, and nucleic acid content in common carp. *Archives of*  
394 *Environmental Contamination and Toxicology*. 33, 415-422.
- 395 Donelson, J. M., et al., 2012. Rapid transgenerational acclimation of a tropical reef fish to climate  
396 change. *Nature Climate Change*. 2, 30-32.
- 397 Donelson, J. M., et al., 2018. Transgenerational plasticity and climate change experiments: Where do  
398 we go from here? *Global Change Biology*. 24, 13-34.
- 399 Eales, J. G., 1985. The peripheral metabolism of thyroid hormones and regulation of thyroidal status  
400 in poikilotherms. *Canadian Journal of Zoology-Revue Canadienne De Zoologie*. 63, 1217-  
401 1231.
- 402 Eyckmans, M., et al., 2010. Hormonal and ion regulatory response in three freshwater fish species  
403 following waterborne copper exposure. *Comparative Biochemistry and Physiology C-*  
404 *Toxicology & Pharmacology*. 152, 270-278.
- 405 Fry, F., 1947. Effects of the environment on animal activity. *Publ Ontario Fish Res Lab*. 68.
- 406 Gardell, A. M., et al., 2017. Exogenous iodide ameliorates perchlorate-induced thyroid phenotypes in  
407 threespine stickleback. *General and Comparative Endocrinology*. 243, 60-69.
- 408 Guo, B. C., et al., 2015. Population genomic evidence for adaptive differentiation in Baltic Sea three-  
409 spined sticklebacks. *Bmc Biology*. 13.



- 410 Habary, A., et al., 2017. Adapt, move or die - how will tropical coral reef fishes cope with ocean  
411 warming? *Global Change Biology*. 23, 566-577.
- 412 Hoseini, S. M., et al., 2016. Toxic effects of copper sulfate and copper nanoparticles on minerals,  
413 enzymes, thyroid hormones and protein fractions of plasma and histopathology in common  
414 carp *Cyprinus carpio*. *Experimental and Toxicologic Pathology*. 68, 493-503.
- 415 Hsu, B. Y., et al., 2016. Maternal adjustment or constraint: differential effects of food availability on  
416 maternal deposition of macro-nutrients, steroids and thyroid hormones in rock pigeon eggs.  
417 *Ecology and Evolution*. 6, 397-411.
- 418 Hsu, B. Y., et al., 2017. Maternal thyroid hormones enhance hatching success but decrease nestling  
419 body mass in the rock pigeon (*Columba livia*). *General and Comparative Endocrinology*. 240,  
420 174-181.
- 421 Hsu, B. Y., et al., 2019. Transient growth-enhancing effects of elevated maternal thyroid hormones at  
422 no apparent oxidative cost during early postnatal period. *Journal of Avian Biology*. 50.
- 423 Kang, D. Y., Chang, Y. J., 2004. Of maternal injection of 3,5,3'-triiodo-L-thyronine (T-3) on growth of  
424 newborn offspring of rockfish, *Sebastes schlegeli*. *Aquaculture*. 234, 641-655.
- 425 Keskitalo, J., Ilus, E., 1987. Aquatic macrophytes outside the Olkiluoto nuclear power stations, west-  
426 coast of Finland. *Annales Botanici Fennici*. 24, 1-21.
- 427 Kim, S. Y., et al., 2019. Carry-over effects of early thermal conditions on somatic and germline  
428 oxidative damages are mediated by compensatory growth in sticklebacks. *Journal of Animal*  
429 *Ecology*. 88, 473-483.
- 430 Kitano, J., Lema, S. C., 2013. Divergence in thyroid hormone concentrations between juveniles of  
431 marine and stream ecotypes of the threespine stickleback (*Gasterosteus aculeatus*).  
432 *Evolutionary Ecology Research*. 15, 143-153.
- 433 Kitano, J., et al., 2010. Adaptive Divergence in the Thyroid Hormone Signaling Pathway in the  
434 Stickleback Radiation. *Current Biology*. 20, 2124-2130.
- 435 Leatherland, J. F., et al., 1989. Thyroid hormone content of eggs and early developmental stages of 3  
436 stocj of goitered Coho salmon (*Oncorhynchus kisutch*) from the great lakes of North America,  
437 and a comparison with a stock from from British Columbia. *Canadian Journal of Fisheries and*  
438 *Aquatic Sciences*. 46, 2146-2152.
- 439 Lehtonen, K., d'Errico, G., Korpinen, S., Regoli, F., Ahkola, H. 2019. Mussel caging and the weight of  
440 evidence approach in the assessment of chemical contamination in coastal waters of Finland  
441 (Baltic Sea). *Frontiers in Marine Science*, in press.
- 442 Little, A. G., et al., 2013. Thyroid hormone actions are temperature-specific and regulate thermal  
443 acclimation in zebrafish (*Danio rerio*). *Bmc Biology*. 11, 15.
- 444 McComb, D. M., et al., 2005. Comparative thyroid hormone concentration in maternal serum and  
445 yolk of the bonnethead shark (*Sphyrna tiburo*) from two sites along the coast of Florida.  
446 *General and Comparative Endocrinology*. 144, 167-173.
- 447 McCormick, M. I., 1999. Experimental test of the effect of maternal hormones on larval quality of a  
448 coral reef fish. *Oecologia*. 118, 412-422.
- 449 Matthiessen, P., et al., 2018. A review of the evidence for endocrine disrupting effects of current-use  
450 chemicals on wildlife populations. *Critical Reviews in Toxicology*. 48, 195-216.
- 451 Metzger, D. C. H., Schulte, P. M., 2017. Persistent and plastic effects of temperature on DNA  
452 methylation across the genome of threespine stickleback (*Gasterosteus aculeatus*).  
453 *Proceedings of the Royal Society B-Biological Sciences*. 284, 7.
- 454 Meylan, S., et al., 2012. Hormonally mediated maternal effects, individual strategy and global  
455 change. *Royal Society Philosophical Transactions Biological Sciences*. 367, 1647-1664.
- 456 Norris, D., Carr, J., 2006. *Endocrine disruption: Biological basis for health effects in human and*  
457 *wildlife*. Oxford University Press, Oxford
- 458 Norris, D. O., Carr, J. A., 2013. *Vertebrate Endocrinology*. Elsevier Academic Press, UK.

- 459 Oliveira, M., et al., 2008. European eel (*Anguilla anguilla* L.) metallothionein, endocrine, metabolic  
460 and genotoxic responses to copper exposure. *Ecotoxicology and Environmental Safety*. 70,  
461 20-26.
- 462 Parmesan, C., Ecological and evolutionary responses to recent climate change. *Annual Review of*  
463 *Ecology Evolution and Systematics*. Annual Reviews, Palo Alto, 2006, pp. 637-669.
- 464 Patel, J., et al., 2011. Thyroid hormones and fetal neurological development. *Journal of*  
465 *Endocrinology*. 209, 1-8.
- 466 Perttola, M., et al., 1982. Heavy metals in Baltic herring and cod. *Marine Pollution Bulletin*. 13, 391-  
467 393.
- 468 Raine, J. C., Leatherland, J. F., 2003. Trafficking of L-triiodothyronine between ovarian fluid and  
469 oocytes of rainbow trout (*Oncorhynchus mykiss*). *Comparative Biochemistry and Physiology*  
470 *B-Biochemistry & Molecular Biology*. 136, 267-274.
- 471 Ruuskanen, S., 2015. Hormonally-mediated maternal effects in birds: Lessons from the flycatcher  
472 model system. *General and Comparative Endocrinology*. 224, 283-293.
- 473 Ruuskanen, S., et al., 2016a. Effects of experimentally manipulated yolk thyroid hormone levels on  
474 offspring development in a wild bird species. *Hormones and Behavior*. 81, 38-44.
- 475 Ruuskanen, S., et al., 2019. Transgenerational endocrine disruption: Does elemental pollution affect  
476 egg or nestling thyroid hormone levels in a wild songbird? *Environmental Pollution*. 247,  
477 725-735.
- 478 Ruuskanen, S., et al., Transgenerational endocrine disruption? Experimental copper exposure, but not  
479 heat stress, leads to elevated egg thyroid hormone levels, bioRxiv 717157; doi:  
480 <https://doi.org/10.1101/717157>)
- 481 Ruuskanen, S., et al., 2016b. Heritable variation in maternally derived yolk androgens, thyroid  
482 hormones and immune factors. *Heredity*. 117, 184-190.
- 483 Ruuskanen, S., et al., 2016c. Temperature-induced variation in yolk androgen and thyroid hormone  
484 levels in avian eggs. *General and Comparative Endocrinology*. 235, 29-37.
- 485 Ruuskanen, S., Hsu, B. Y., 2018. Maternal Thyroid Hormones: An Unexplored Mechanism Underlying  
486 Maternal Effects in an Ecological Framework. *Physiological and Biochemical Zoology*. 91,  
487 904-916.
- 488 Salinas, S., Munch, S. B., 2012. Thermal legacies: transgenerational effects of temperature on growth  
489 in a vertebrate. *Ecology Letters*. 15, 159-163.
- 490 Sanchez, W., et al., 2005. Copper-induced oxidative stress in three-spined stickleback: relationship  
491 with hepatic metal levels. *Environmental Toxicology and Pharmacology*. 19, 177-183.
- 492 Scholz, S., Mayer, I., 2008. Molecular biomarkers of endocrine disruption in small model fish.  
493 *Molecular and Cellular Endocrinology*. 293, 57-70.
- 494 Shama, L. N. S., et al., 2014. Transgenerational plasticity in marine sticklebacks: maternal effects  
495 mediate impacts of a warming ocean. *Functional Ecology*. 28, 1482-1493.
- 496 Shama, L. N. S., Wegner, K. M., 2014. Grandparental effects in marine sticklebacks: transgenerational  
497 plasticity across multiple generations. *Journal of Evolutionary Biology*. 27, 2297-2307.
- 498 Stillman, J. H., Armstrong, E., 2015. Genomics Are Transforming Our Understanding of Responses to  
499 Climate Change. *Bioscience*. 65, 237-246.
- 500 Uller, T., et al., 2007. Consequences of maternal yolk testosterone for offspring development and  
501 survival: experimental test in a lizard. *Functional Ecology*. 21, 544-551.
- 502 Wei, P.H., Zhao, F., Zhang, X.N., Liu, W.M., Jiang, G.B., Wang, H.F., Ru, S.G., 2018. Transgenerational  
503 thyroid endocrine disruption induced by bisphenol S affects the early development of  
504 zebrafish offspring. *Environmental Pollution* 243, 800-808.

505

506



508 Figures:

509

510 Fig 1. Sampling locations across the Baltic Sea. Yellow-and-black symbols refer to sites with

511 nuclear power plant discharge water and green symbols to reference populations.

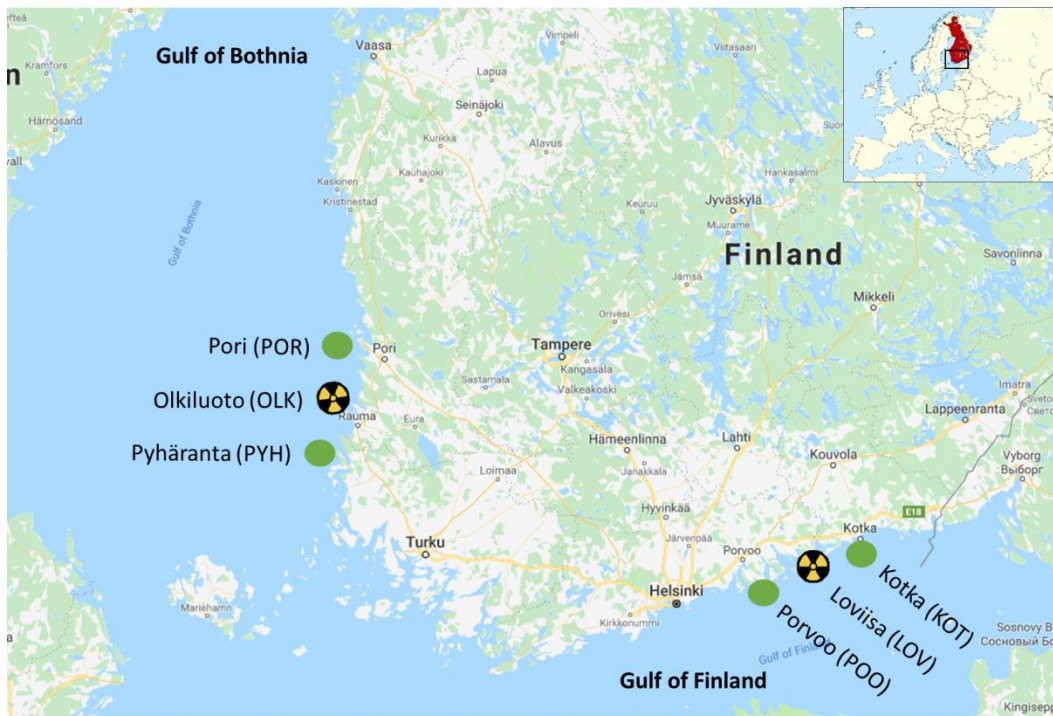

512

513

514 Fig. 2. Intraovarian T3 (a) and T4 (b) concentrations (pg/mg, mean $\pm$ SEs) in three-  
515 spined sticklebacks from six populations across the Baltic Sea coast. Numbers above  
516 the bars refer to sample sizes. POO was excluded from the statistical analysis due to  
517 low sample size.

518 a)

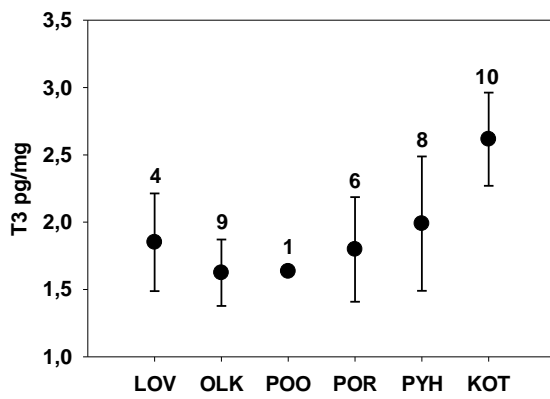

b)

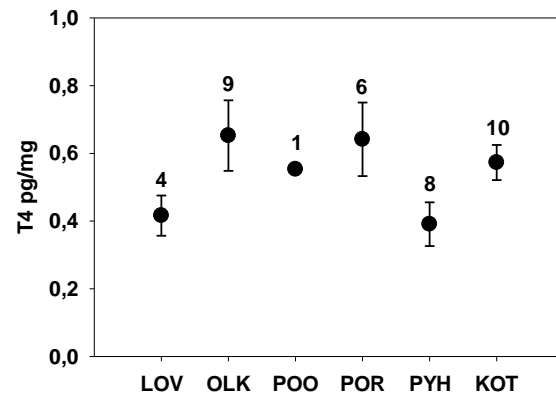

519

520

521 Fig.3. Intraovarian T3 (a) and T4 (b) concentrations (pg/mg, mean±SEs) in three-spined  
522 sticklebacks experimentally exposed to copper (100µg/L, CU 7D), warm temperature (10°C  
523 increase, HS 7D) or respective controls (CTRL 7D) for 7 days. Numbers above the bars refer  
524 to sample sizes. Stars represent significant differences between treatments at  $p < 0.05$ . For the  
525 statistical analyses the populations were pooled.

526

527 a)

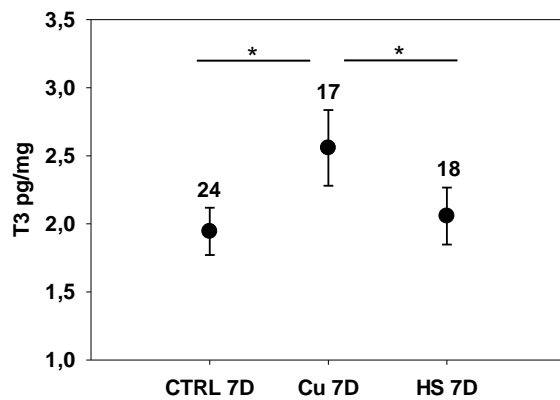

527 b)

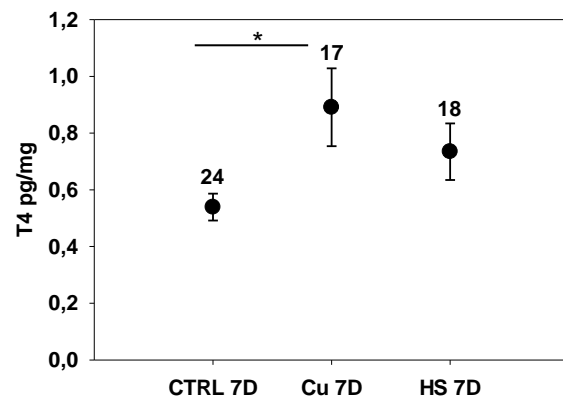

528

529

530

531

532

533 Supplementary Table 1. The environmental variables (mean $\pm$ SD) of catching locations across  
534 the Baltic Sea.

| Location | Temperature<br>during catching | Salinity      | pH  | Average $\pm$ SD temperature<br>16/5/–31/8/2018 |
|----------|--------------------------------|---------------|-----|-------------------------------------------------|
| LOV      | 19.9 $\pm$ 1.6                 | 3.2 $\pm$ 0.2 | 7.6 | 19.6 $\pm$ 4.4                                  |
| OLK      | 20.1 $\pm$ 0.1                 | 5.3 $\pm$ 0.0 | 9.0 | 19.9 $\pm$ 3.6                                  |
| POO      | 18.8 $\pm$ 0.5                 | 4.3 $\pm$ 0.0 | 9.0 | 19.1 $\pm$ 4.2                                  |
| POR      | 18.9 $\pm$ 0.8                 | 4.9 $\pm$ 0.0 | 9.0 | 19.7 $\pm$ 3.4                                  |
| PYH      | 17.6 $\pm$ 1.1                 | 4.2 $\pm$ 0.4 | 9.0 | 19.5 $\pm$ 2.5                                  |
| KOT      | 18.1 $\pm$ 0.7                 | 1.7 $\pm$ 0.0 | 9.0 | 17.3 $\pm$ 4.9                                  |

535

536

537

538 Supplementary Table 2. The average lengths (mm, SE) of fish captured from six different  
539 locations (populations) across the Baltic Sea. Populations with different letters are statistically  
540 significantly different from each other ( $p < 0.05$ , Tukey post-hoc test). POO was not included  
541 in the statistical analyses due to small sample size.

| Location | Fish size, mm<br>average (SE) |
|----------|-------------------------------|
| LOV      | $6.4 \pm 0.4ab$               |
| OLK      | $6.6 \pm 0.3b$                |
| POO      | $6.1 \pm 0.7$                 |
| POR      | $6.9 \pm 0.3b$                |
| PYH      | $6.5 \pm 0.3b$                |
| KOT      | $5.2 \pm 0.2a$                |

542

543

544

545
